# Supplementary material for: Probing P25 TiO2 photocatalysis using photoinduced absorption spectroscopy (PIAS)
Source: Royal Society of Chemistry journal article supplement (doi:10.1039/d0cc07794a), 2020-12-30
Supplement: d0cc07794a1.pdf [file d0cc07794a1.pdf]

## **Probing P25 TiO<sub>2</sub> Photocatalysis Using Photoinduced Absorption Spectroscopy (PIAS)**

Christopher O'Rourke and Andrew Mills\*

Queens University Belfast, School of Chemistry and Chemical Engineering, David  
Keir Building, Stranmillis Road, Belfast, UK, BT9 5AG

\*: e-mail: [andrew.mills@qub.ac.uk](mailto:andrew.mills@qub.ac.uk)

## S1 Preparation of the P25 TiO<sub>2</sub> film

Briefly, the supporting substrate, usually FTO coated glass (20 mm x 15 mm x 4 mm, TEC-15, Pilkington Glass plc) was first coated with a 100 nm dense TiO<sub>2</sub> blocking layer using the spin-coating method reported by Oku et al.<sup>1</sup>, in order to prevent direct contact of the background electrolyte (always 1M HClO<sub>4</sub>) with the FTO. A small 5 mm x 15 mm track was masked with Scotch® Magic™ tape prior to spin-coating to preserve an area of bare FTO to allow electrical contact to be made with the potentiostat, when used. Each substrate was then spin-coated with a titanium diisopropoxide bis(acetylacetonate) in butanol (0.3 M) solution and the barrier film-coated product annealed at 500 °C for 30 min. This was followed by doctor-blade deposition of a ca. 1.7 μm thick layer of P25 TiO<sub>2</sub> from a paste of TiO<sub>2</sub> (76 mg of P25 TiO<sub>2</sub> in: 20 μL acetic acid, 20 μL water, 3.98 mL ethanol, 0.43 g terpeneol, and 0.74 g of 10% w/w ethyl cellulose in methanol) which was cast as a 60 μm thick wet layer and then annealed at 500°C for 30 min. The UV/Visible absorption spectrum and a photograph of the final, slightly opalescent, 1.7 μm thick, film are illustrated in Fig. S1, along with the emission spectrum of the UV LED used in this work. Scanning electron microscopy revealed the film to be mesoporous, comprising a network of loosely packed interconnected particles ca. 30-40 nm in diameter, and similar in appearance to the P25 TiO<sub>2</sub> photoanodes reported by others.<sup>2</sup>

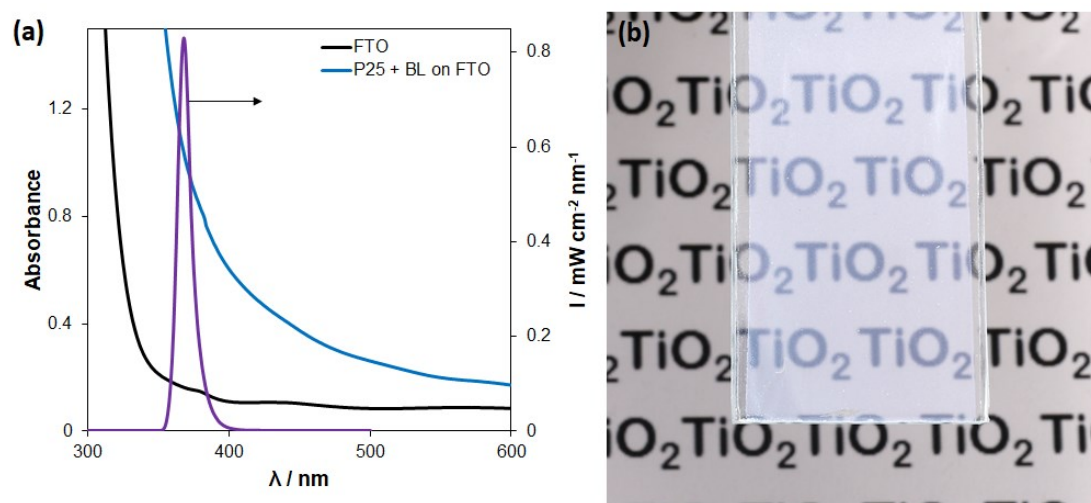

**Fig. S1:** (a) U/vis absorption spectrum of the FTO coated glass substrate with and without the P25 TiO<sub>2</sub> film and the emission spectrum of the UV LED used in this work and (b) photograph of a typical P25 TiO<sub>2</sub> film on FTO used throughout this work.

## S2 Analysis of light off photocurrents

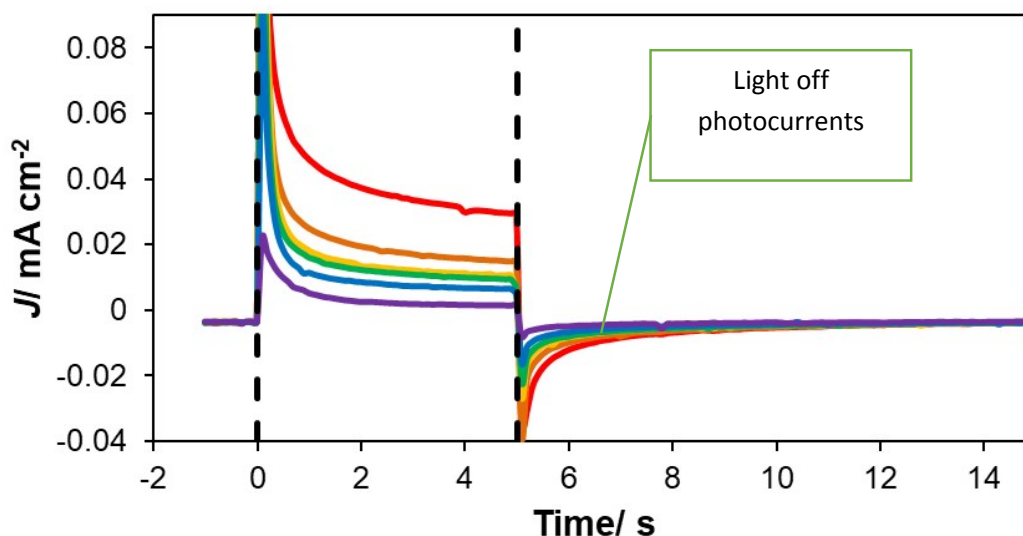

**Fig. S2.** Plots of the measured photocurrent,  $J$ , as a function of time, exhibited by a P25 TiO<sub>2</sub> photoanode poised at -0.19 V vs Ag/AgCl and in 0.1 M 4CP (in O<sub>2</sub>-free, 1 M HClO<sub>4</sub>), before during and after steady state irradiation, using different 365 nm UV irradiances; namely (from bottom to top): 113, 56, 36, 33, 21 and 6 mW cm<sup>-2</sup>, respectively.

The 'light-off' photocurrents illustrated in Fig. S2 are due to back electron-hole recombination.<sup>3</sup> It can be shown that for each of these current decays the contribution the concentration of holes involved in the recombination process,  $[h^+]_{\text{rec}}$ , i.e. the area under the current decay curve, is much less than the associated steady-state value of the accumulated surface holes,  $[h^+]_{\text{ss}}$ . This is best illustrated using the biggest current decay curve, in red in Fig. S2, which reveals upon integration with time an area = 0.0307 mC cm<sup>-2</sup>  $\equiv$  1.92 holes nm<sup>-2</sup>. But, the P25 TiO<sub>2</sub> has a roughness factor of ca. 33, so the real total hole density associated with recombination = 0.058 holes nm<sup>-2</sup>. Obviously, this hole density will make a fractional contribution,  $f$ , to the measured value of  $\Delta\text{Abs}_{\text{ss}}$ . The value of  $\Delta\text{Abs}_{\text{ss}}$  - for the red line data set under consideration ( $\rho = 113$  mW cm<sup>-2</sup>) - was ca.  $0.28 \times 10^{-3}$ , see Fig. 2(b). The value of  $f$  can then be calculated by assuming the molar absorptivity of the photogenerated holes on P25 TiO<sub>2</sub> is that reported previously for TiO<sub>2</sub>, i.e. ca. 2000 M<sup>-1</sup>cm<sup>-1</sup>, which is equivalent to  $3.32 \times 10^{-4}$  nm<sup>2</sup> holes<sup>-1</sup>.<sup>3</sup> Thus, the total steady-state hole density =  $0.28 \times 10^{-3} / 3.32 \times 10^{-4} = 0.84$  nm<sup>2</sup> holes<sup>-1</sup> and so the value of  $f = 0.058 / 0.84 = 0.069$ , i.e. < 7%. When analysed in the same way all the other current curves illustrated in Fig. S2 yield values for  $f$  that are < 7%. Thus, in all this work back electron-hole recombination does not make a significant contribution (i.e. < 7%) to the measured values of  $\Delta\text{Abs}_{\text{ss}}$ ,  $J_{\text{ss}}$  and the decay kinetics exhibited by  $\Delta\text{Abs}_{\text{ss}}$ , upon switching off the light. Further evidence for the latter is provided by the excellent fit to all the  $\Delta\text{Abs}_{\text{ss}}$  vs time profiles illustrated in fig. 2(a) to first order kinetics with a rate constant of 0.3 s<sup>-1</sup>. In addition, the light-off photocurrents exhibit bi-exponential decay kinetics, dominated (> 65%) by a fast step ( $k = \text{ca. } 7$  s<sup>-1</sup>) which is over 20 times quicker than the decay of  $\Delta\text{Abs}_{\text{ss}}$  on switch off (0.3 s<sup>-1</sup>); these very different kinetic profiles suggest, once again, that back electron-hole recombination kinetics involves a relatively low value of  $[h^+]_{\text{rec}}$  compared to  $[h^+]_{\text{ss}}$ , and so contributes little to the measured values of  $\Delta\text{Abs}_{\text{ss}}$  and  $J_{\text{ss}}$ . As a result, the values of  $\Delta\text{Abs}_{\text{ss}}$ ,  $J_{\text{ss}}$  and the decay kinetics exhibited by  $\Delta\text{Abs}_{\text{ss}}$ , upon switching off the light

are determined by the kinetics of oxidation of 4CP by surface accumulated, photogenerated holes.

#### References

- 1 T. Oku, T. Matsumoto, A. Suzuki, K. Suzuki, *Coatings*, 2015, **5**, 646.
- 2 A. Wahl, M. Ulmann, A. Carroy and J. Augustynski, *J. Chem. Soc., Chem. Commun.*, 1994, 2277.
- 3 A. Kafizas, Y. Ma, E. Pastor, S.R. Pendlebury, C. Mesa, L. Francàs, F. Le Formal, N. Noor, M. Ling, C. Sotelo-Vazquez, C.J. Carmalt, I.P. Parkin, J.R. Durrant, *ACS Catal.*, 2017, **7**, 4896.
